# Supplementary material for: Impact of the COVID‐19 Epidemic on Inhalant Allergen Sensitization in Children
Source: Hindawi journal article supplement (doi:10.1155/2024/5641948), 2024-01-01
Supplement: f1 [file 5641948.f1.docx]

Table S1. Differences in positive rates of inhaled allergens during and during the COVID-19

| Allergen  (n) | Positive case  n (%) | Before the COVID-19  n (%) | During the COVID-19  n (%) | *X2* | *p* |
| --- | --- | --- | --- | --- | --- |
| d1(n=6107) | 2711(44.39) | 1100(38.5) | 1611(49.5) | 74.261 | <0.001 |
| d2(n=4801) | 2053(42.76) | 641(32.2) | 1412(50.2) | 154.582 | <0.001 |
| e2(n=21510) | 1976(9.19) | 309(6.1) | 1667(10.1) | 75.458 | <0.001 |
| mx2(n=26334) | 1947(7.4) | 264(2.7) | 1683(10.1) | 489.388 | <0.001 |
| Sycamore(n=13647) | 916(6.71) | 28(2.1) | 888(7.2) | 49.052 | <0.001 |
| e1(n=14460) | 834(5.77) | 22(1.7) | 812(6.2) | 44.819 | <0.001 |
| w1(n=19904) | 705(3.54) | 65(1.7) | 640(4.0) | 51.171 | <0.001 |
| elm(n=13647) | 391(2.87) | 8(0.6) | 383(3.1) | 26.730 | <0.001 |
| w6(n=19656) | 542(2.76) | 71(1.7) | 471(3.0) | 21.631 | <0.001 |
| i6(n=21593) | 530(2.45) | 138(2.7) | 392(2.4) | 1.482 | 0.223 |
| w14(n=1592) | 34(2.14) | 26(2.3) | 8(1.7) | 0.498 | 0.481 |
| t70(n=1592) | 29(1.82) | 20(1.8) | 9(2.0) | 0.062 | 0.803 |

**Abbreviations**: Dermatophagoides pteronyssinus (d1), Dermatophagoides farinae (d2), dog hair (e2), cat hair (e1), cockroaches (i6), mulberry (t70), sycamore pollen (sycamore), elm pollen (elm), grass pollen (u80), mugwort pollen (w6), common ragweed pollen (w1), amaranth (w14), green oysters (f37), mold (mx2).

Table S2. Gender difference in the positive rate of inhaled allergens before and during COVID-19

| Allergen | Before the COVID-19 | | | |  | During the COVID-19 | | | |
| --- | --- | --- | --- | --- | --- | --- | --- | --- | --- |
| Male  n (%) | Female  n (%) | *X2* | *P* |  | Male  n (%) | Female  n (%) | *X2* | *P* |
| d1 | 695(40.1) | 405(36.1) | 4.670 | 0.031 |  | 1043(51.5) | 568(46.2) | 8.642 | 0.003 |
| d2 | 410(33.0) | 231(30.9) | 0.908 | 0.341 |  | 909(51.5) | 503(48.0) | 3.199 | 0.074 |
| e2 | 208(6.5) | 101(5.4) | 2.860 | 0.091 |  | 1009(9.7) | 658(11.0) | 7.342 | 0.007 |
| mx2 | 175(2.8) | 89(2.6) | 0.130 | 0.718 |  | 1076(10.2) | 607(10.0) | 0.170 | 0.680 |
| sycamore | 18(2.1) | 10(2.2) | 0.041 | 0.839 |  | 572(7.1) | 316(7.4) | 0.316 | 0.574 |
| e1 | 12(1.4) | 10(2.2) | 1.329 | 0.249 |  | 520(6.1) | 292(6.4) | 0.631 | 0.427 |
| w1 | 51(2.0) | 14(1.0) | 6.242 | 0.012 |  | 412(4.0) | 228(3.9) | 0.132 | 0.717 |
| elm | 5(0.6) | 3(0.7) | 0.000 | 1.000 |  | 246(3.1) | 137(3.2) | 0.188 | 0.664 |
| w6 | 48(1.8) | 23(1.5) | 0.569 | 0.451 |  | 302(3.0) | 169(3.0) | 0.011 | 0.916 |
| i6 | 90(2.8) | 48(2.5) | 0.356 | 0.551 |  | 277(2.6) | 115(1.9) | 8.723 | 0.003 |
| w14 | 21(3.1) | 5(1.1) | 4.880 | 0.027 |  | 4(1.5) | 4(2.1) | 0.273 | 0.601 |
| T70 | 15(2.2) | 5(1.1) | 1.964 | 0.161 |  | 6(2.2) | 3(1.6) | / | 0.743 |
| u80 | 13(0.5) | 7(0.5) | 0.015 | 0.902 |  | 142(1.4) | 65(1.1) | 2.184 | 0.139 |
| f37 | 1(0.1) | 1(0.2) | 0.080 | 0.778 |  | 2(0.7) | 0(0.0) | 1.396 | 0.237 |

**Note:** / indicates that there is no data for this item. Abbreviations: Dermatophagoides pteronyssinus (d1), Dermatophagoides farinae (d2), dog hair (e2), cat hair (e1), cockroaches (i6), mulberry (t70), sycamore pollen (sycamore), elm pollen (elm), grass pollen (u80), mugwort pollen (w6), common ragweed pollen (w1), amaranth (w14), green oysters (f37), mold (mx2).

Table S3. Age differences in the positive rate of allergens before and during COVID-19

| Allergens | Before the COVID-19 | | | | |  | During the COVID-19 | | | | |
| --- | --- | --- | --- | --- | --- | --- | --- | --- | --- | --- | --- |
|  |
| Infant  n (%) | Preschool  n (%) | School  n (%) | Adolescence  n (%) | *P* |  | Infant  n (%) | Preschool  n (%) | School  n (%) | Adolescence  n (%) | *P* |
| d1 | 117(13.2) | 436(42.8) | 367(55.5) | 180(62.1) | <0.001 |  | 62(12.4) | 613(46.2) | 599(62.5) | 337(72.5) | <0.001 |
| d2 | 75(9.3) | 256(40.8) | 200(53.3) | 110(60.8) | <0.001 |  | 54(12.2) | 538(47.9) | 520(62.1) | 300(73.2) | <0.001 |
| e2 | 125(8.2) | 124(6.1) | 47(4.4) | 13(2.9) | <0.001 |  | 363(9.7) | 820(11.0) | 368(9.7) | 116(8.1) | 0.002 |
| mx2 | 79(2.3) | 94(2.6) | 68(3.7) | 23(3.0) | 0.026 |  | 411(10.8) | 798(10.6) | 346(9.0) | 128(8.8) | 0.008 |
| sycamore | 9(1.7) | 17(3.0) | 2(1.1) | 0(0.0) | 0.304 |  | 214(7.2) | 454(8.0) | 170(6.4) | 50(5.0) | 0.001 |
| e1 | 7(1.3) | 10(1.8) | 2(1.1) | 3(5.5) | 0.178 |  | 187(6.1) | 373(6.2) | 192(6.5) | 60(5.5) | 0.643 |
| w1 | 18(1.4) | 31(2.0) | 11(1.5) | 65(1.7) | 0.636 |  | 183(5.0) | 303(4.2) | 110(3.0) | 44(3.2) | <0.001 |
| elm | 2(0.4) | 4(0.7) | 2(1.1) | 0(0.0) | 0.601 |  | 81(2.7) | 181(3.2) | 91(3.4) | 30(3.0) | 0.487 |
| w6 | 14(1.1) | 29(1.8) | 18(2.2) | 10(2.8) | 0.064 |  | 101(2.8) | 223(3.2) | 105(3.0) | 42(3.2) | 0.769 |
| i6 | 23(1.5) | 48(2.3) | 45(4.1) | 22(4.8) | <0.001 |  | 77(2.0) | 162(2.2) | 95(2.5) | 58(4.0) | <0.001 |
| w14 | 3(1.2) | 11(2.4) | 10(3.3) | 2(1.6) | 0.425 |  | 1(1.6) | 4(1.9) | 2(1.6) | 1(1.7) | 1.000 |
| T70 | 2(0.8) | 10(2.2) | 4(1.3) | 4(3.1) | 0.325 |  | 1(1.6) | 4(1.9) | 2(1.6) | 2(3.4) | 0.854 |
| u80 | 3(0.2) | 5(0.3) | 8(1.1) | 4(1.2) | 0.013 |  | 36(1.0) | 104(1.4) | 50(1.4) | 17(1.7) | 0.232 |
| f37 | 0(0.0) | 1(0.2) | 1(0.3) | 0(0.0) | 1.000 |  | 0(0.0) | 0(0.0) | 1(0.8) | 1(1.7) | 0.139 |

**Note:** / indicates that there is no data for this item. Abbreviations: Dermatophagoides pteronyssinus (d1), Dermatophagoides farinae (d2), dog hair (e2), cat hair (e1), cockroaches (i6), mulberry (t70), sycamore pollen (sycamore), elm pollen (elm), grass pollen (u80), mugwort pollen (w6), common ragweed pollen (w1), amaranth (w14), green oysters (f37), mold (mx2).

Table S4. Seasonal differences in the positive rate of allergens before and during the COVID-19

**Note:** / indicates that there is no data for this item. Abbreviations: Dermatophagoides pteronyssinus (d1), Dermatophagoides farinae (d2), dog hair (e2), cat hair (e1), cockroaches (i6), mulberry (t70), sycamore pollen (sycamore), elm pollen (elm), grass pollen (u80), mugwort pollen (w6), common ragweed pollen (w1), amaranth (w14), green oysters (f37), mold (mx2).

| Allergens | Before COVID-19 | | | | |  | During COVID-19 | | | | |
| --- | --- | --- | --- | --- | --- | --- | --- | --- | --- | --- | --- |
|  |
| Spring  n (%) | Summer  n (%) | Autumn  n (%) | Winter  n (%) | *P* |  | Spring  n (%) | Summer  n (%) | Autumn  n (%) | Winter  n (%) | *P* |
| d1 | 259(31.7) | 399(48.8) | 247(41.7) | 195(31.1) | <0.001 |  | 333(44.7) | 527(58.8) | 496(49.1) | 255(42.4) | <0.001 |
| d2 | 142(24.4) | 220(44.1) | 141(36.6) | 138(26.3) | <0.001 |  | 270(45.8) | 472(59.1) | 449(49.2) | 221(43.4) | <0.001 |
| e2 | 70(7.2) | 59(5.2) | 60(5.0) | 120(6.8) | 0.051 |  | 420(9.6) | 535(11.9) | 468(9.8) | 244(8.8) | <0.001 |
| mx2 | 59(2.6) | 57(2.2) | 64(2.5) | 84(3.6) | 0.025 |  | 533(12.0) | 522(11.4) | 399(8.2) | 229(8.2) | <0.001 |
| sycamore | / | / | 10(3.0) | 18(1.8) | 0.195 |  | 257(7,5) | 292(8.9) | 228(6.6) | 111(5.1) | <0.001 |
| e1 | / | / | 7(2.1) | 15(1.5) | 0.470 |  | 207(5.8) | 281(7.9) | 189(5.0) | 135(6.0) | <0.001 |
| w1 | 12(1.9) | 12(1.6) | 9(0.9) | 32(2.0) | 0.209 |  | 224(5.3) | 199(4.5) | 162(3.5) | 55(2.1) | <0.001 |
| elm | / | / | 3(0.9) | 5(0.5) | 0.423 |  | 95(2.8) | 137(4.2) | 111(3.2) | 40(1.9) | <0.001 |
| w6 | 14(1.9) | 16(2.0) | 19(1.9) | 22(1.3) | 0.548 |  | 95(2.3) | 186(4.4) | 130(2.9) | 60(2.3) | <0.001 |
| i6 | 35(3.5) | 38(3.2) | 31(2.6) | 34(1.9) | 0.042 |  | 77(1.8) | 146(3.3) | 128(2.7) | 41(1.5) | <0.001 |
| w14 | 14(4.3) | 5(1.3) | 1(0.4) | 6(3.2) | 0.009 |  | 1(0.6) | 3(3.0) | 2(1.9) | 2(2.0) | 0.534 |
| T70 | 10(3.0) | 6(1.6) | 2(0.8) | 2(1.1) | 0.233 |  | 2(1.3) | 4(4.0) | 2(1.9) | 1(1.0) | 0.499 |
| u80 | 0(0.0) | 7(0.9) | 3(0.3) | 10(0.6) | 0.055 |  | 47(1.1) | 77(1.8) | 61(1.3) | 22(0.8) | 0.004 |
| f37 | 2(0.6) | 0(0.0) | 0(0.0) | 0(0.0) | 0.229 |  | 0(0.0) | 2(2.0) | 0(0.0) | 0(0.0) | 0.091 |

Table S5. Impact of COVID-19 pandemic on allergen sensitization in subgroups by genders[(n) %]

| **Allergen** | **Male**  **(n=19125)** | | | |  | **Females**  **(n=10801)** | | | |
| --- | --- | --- | --- | --- | --- | --- | --- | --- | --- |
| Before COVID-19  n (%) | During COVID-19  n (%) | *OR（OR 95% CI）* | *P* |  | Before COVID-19  n (%) | During COVID-19  n (%) | *OR（*OR 95% CI*）* | *P* |
| **d1** | 695(40.1) | 1043(51.5) | 1.586(1.393,1.806） | <0.001 |  | 405(36.1) | 568(46.2) | 1.152(1.289,1.795) | <0.001 |
| **d2** | 410(33.0) | 909(51.5) | 2.160(1.858,2.511) | <0.001 |  | 231(30.9) | 503(48.0) | 2.065(1.696,2.515) | <0.001 |
| **e2** | 208(6.5) | 1009(9.7) | 1.527 (1.308,1.782) | <0.001 |  | 101(5.4) | 658(11.0) | 2.176 (1.753,2.701) | <0.001 |
| **mx2** | 175(2.8) | 1076(10.2) | 3.989 (3.390,4.695) | <0.001 |  | 89(2.6) | 607(10.0) | 4.093 (3.263,5.134) | <0.001 |
| **sycamore** | 18(2.1) | 572(7.1) | 3.626 (2.256,5.828) | <0.001 |  | 10(2.2) | 316(7.4) | 3.484 (1.842,6.588) | <0.001 |
| **e1** | 12(1.4) | 520(6.1) | 4.615(2.593,8.215) | <0.001 |  | 10(2.2) | 292(6.4) | 2.992 (1.581,5.662) | <0.001 |
| **w1** | 51(2.0) | 412(4.0) | 2.030(1.512,2.725) | <0.001 |  | 14(1.0) | 228(3.9) | 4.134 (2.402,7.114) | <0.001 |
| **elm** | 5(0.6) | 246(3.1) | 5.462(2.247,13.276) | <0.001 |  | 3(0.7) | 137(3.2) | 4.892 (1.552,15.419) | 0.001 |
| **w6** | 48(1.8) | 302(3.0) | 1.693(1.245,2.303) | 0.001 |  | 23(1.5) | 169(3.0) | 2.032 (1.309,3.153) | 0.009 |
| **i6** | 90(2.8) | 277(2.6) | 0.949(0.746,1.208) | 0.670 |  | 48(2.5) | 115(1.9) | 0.760 (0.541,1.069) | 0.114 |
| **w14** | 21(3.1) | 4(1.5) | 0.466(0.158,1.369) | 0.165 |  | 5(1.1) | 4(2.1) | 1.946 (0.517,7.327) | 0.527 |
| **t70** | 15(2.2) | 6(2.2) | 0.994(0.382,2.589) | 0.990 |  | 5(1.1) | 3(1.6) | 1.452 (0.343,6.136) | 0.905 |
| **u80** | 13(0.5) | 142(1.4) | 2.714(1.535,4.797) | 0.001 |  | 7(0.5) | 65(1.1) | 2.302 (1.053,3.153) | 0.032 |
| **f37** | 1(0.1) | 2(0.7) | 5.000(0.452,55.370) | 0.190 |  | 1(0.2) | 0(0.0) | / | / |

**Note:** / indicates that there is no data for this item. Abbreviations: Dermatophagoides pteronyssinus (d1), Dermatophagoides farinae (d2), dog hair (e2), cat hair (e1), cockroaches (i6), mulberry (t70), sycamore pollen (sycamore), elm pollen (elm), grass pollen (u80), mugwort pollen (w6), common ragweed pollen (w1), amaranth (w14), green oysters (f37), mold (mx2).

Table S6. Impact of COVID-19 pandemic on allergen sensitization in subgroups by age groups[(n) %]

| **Allergen** | **Infant** | | | |  | **Preschool** | | | |  | **School** | | | |  | **adolescence** | | | |
| --- | --- | --- | --- | --- | --- | --- | --- | --- | --- | --- | --- | --- | --- | --- | --- | --- | --- | --- | --- |
| Before  n (%) | During  n (%) | *OR（OR 95% CI）* | *P* |  | Before  n (%) | During  n (%) | *OR（OR 95% CI）* | *P* |  | Before  n (%) | During  n (%) | *OR（OR 95% CI）* | *P* |  | Before  n (%) | During  n (%) | *OR（OR 95% CI）* | *P* |
| **d1** | 117(13.2) | 62(12.4) | 0.927(0.667,1.289) | 0.652 |  | 436(42.8) | 613(46.2) | 1.144(0.971,1.349) | 0.108 |  | 367(55.5) | 599(62.5) | 1.333(1.090,1.631) | 0.005 |  | 180(62.1) | 337(72.5) | 1.609(1.177,2.199) | 0.003 |
| **d2** | 75(9.3) | 54(12.2) | 1.360(0.939,1.971) | 0.104 |  | 256(40.8) | 538(47.9) | 1.363(1.097,1.628) | 0.004 |  | 200(53.3) | 520(62.1) | 1.435(1.122,1.836) | 0.004 |  | 110(60.8) | 300(73.2) | 1.760(1.216,2.548) | 0.003 |
| **e2** | 125(8.2) | 363(9.7) | 1.190(0.962,1.472) | 0.109 |  | 124(6.1) | 820(11.0) | 1.892(1.555,2.300) | <0.001 |  | 47(4.4) | 368(9.7) | 2.336(1.710,3.189) | <0.001 |  | 13(2.9) | 116(8.1) | 2.986(1.666,5.350) | <0.001 |
| **mx2** | 79(2.3) | 411(10.8) | 5.143(4.023,6.573) | <0.001 |  | 94(2.6) | 798(10.6) | 4.479(3.618,5.590) | <0.001 |  | 68(3.7) | 346(9.0) | 2.595(1.989,3.387) | <0.001 |  | 23(3.0) | 128(8.8) | 3.067(1.950,4.824) | <0.001 |
| **sycamore** | 9(1.7) | 214(7.2) | 4.391(2.239,8.611) | <0.001 |  | 17(3.0) | 454(8.0) | 2.796(1.709,4.574) | <0.001 |  | 2(1.1) | 170(6.4) | 6.050(1.488,24.589) | 0.012 |  | 0(0.0) | 50(5.0) | / | 0.997 |
| **e1** | 7(1.3) | 187(6.1) | 4.716(2.205,10.089) | <0.001 |  | 10(1.8) | 373(6.2) | 3.654(1.938,6.889) | <0.001 |  | 2(1.1) | 192(6.5) | 6.234(1.535,25.315) | 0.010 |  | 3(5.5) | 60(5.5) | 1.006(0.305,3.314) | 0.992 |
| **w1** | 18(1.4) | 183(5.0) | 3.639(2.233,5.930) | <0.001 |  | 31(2.0) | 303(4.2) | 2.163(1.489,3.144) | <0.001 |  | 11(1.5) | 110(3.0) | 2.116(1.133,3.953) | 0.019 |  | 65(1.7) | 44(3.2) | 2.133(0.839,5.421) | 0.112 |
| **elm** | 2(0.4) | 81(2.7) | 7.230(1.772,29.497) | 0.006 |  | 4(0.7) | 181(3.2) | 4.609(1.705,12.460) | 0.003 |  | 2(1.1) | 91(3.4) | 3.139(0.767,12.848) | 0.112 |  | 0(0.0) | 30(3.0) | / | 0.997 |
| **w6** | 14(1.1) | 101(2.8) | 2.725(1.553,4.783) | <0.001 |  | 29(1.8) | 223(3.2) | 1.824(1.234,2.696) | 0.003 |  | 18(2.2) | 105(3.0) | 1.362(0.821,2.259) | 0.231 |  | 10(2.8) | 42(3.2) | 1.134(0.563,2.283) | 0.725 |
| **i6** | 23(1.5) | 77(2.0) | 1.375(0.860,2.199) | 0.184 |  | 48(2.3) | 162(2.2) | 0.926(0.669,1.283) | 0.645 |  | 45(4.1) | 95(2.5) | 0.599(0.417,0.859) | 0.005 |  | 22(4.8) | 58(4.0) | 0.841(0.509,1.389) | 0.498 |
| **w14** | 3(1.2) | 1(1.6) | 1.322(0.135,12.937) | 0.810 |  | 11(2.4) | 4(1.9) | 0.780(0.245,2.478) | 0.673 |  | 10(3.3) | 2(1.6) | 0.466(0.101,2.158) | 0.329 |  | 2(1.6) | 1(1.7) | 1.078(0.096,12.125) | 0.952 |
| **t70** | 2(0.8) | 1(1.6) | 1.992(0.178,22.333) | 0.576 |  | 10(2.2) | 4(1.9) | 0.860(0.266,2.773) | 0.800 |  | 4(1.3) | 2(1.6) | 1.189(0.215,6.574) | 0.843 |  | 4(3.1) | 2(3.4) | 1.079(0.192,6.063) | 0.931 |
| **u80** | 3(0.2) | 36(1.0) | 4.174(1.283,13.577) | 0.018 |  | 5(0.3) | 104(1.4) | 4.554(1.853,11.190) | 0.001 |  | 8(1.1) | 50(1.4) | 1.306(0.617,2.766) | 0.486 |  | 4(1.2) | 17(1.7) | 1.013(0.338,3.030) | 0.982 |
| **f37** | 0(0.0) | 0(0.0) | / | / |  | 1(0.2) | 0(0.0) | / | 0.996 |  | 1(0.3) | 1(0.8) | 2.383(0.148,38.389) | 0.540 |  | 0(0.0) | 1(1.7) | / | 0.996 |

**Note:** / indicates that there is no data for this item. Abbreviations: Dermatophagoides pteronyssinus (d1), Dermatophagoides farinae (d2), dog hair (e2), cat hair (e1), cockroaches (i6), mulberry (t70), sycamore pollen (sycamore), elm pollen (elm), grass pollen (u80), mugwort pollen (w6), common ragweed pollen (w1), amaranth (w14), green oysters (f37), mold (mx2).

Table S7. Impact of COVID-19 pandemic on allergen sensitization in subgroups by season groups[(n) %]

| **Allergen** | Spring | | | |  | Summer | | | |  | Autumn | | | |  | Winter | | | |
| --- | --- | --- | --- | --- | --- | --- | --- | --- | --- | --- | --- | --- | --- | --- | --- | --- | --- | --- | --- |
| Before  n (%) | During  n (%) | OR（OR 95% CI） | *P* |  | Before  n (%) | During  n (%) | OR（OR 95% CI） | *P* |  | Before  n (%) | During  n (%) | OR（OR 95% CI） | *P* |  | Before  n (%) | During  n (%) | OR（OR 95% CI） | *P* |
| **d1** | 259(31.7) | 333(44.7) | 1.741(1.417,2.140) | <0.001 |  | 399(48.8) | 527(58.8) | 1.498(1.236,1.811) | <0.001 |  | 247(41.7) | 496(49.1) | 1.349(1.100,1.655) | 0.004 |  | 195(31.1) | 255(42.4) | 1.633(1.292,2.063) | <0.001 |
| **d2** | 142(24.4) | 270(45.8) | 2.614(2.038,3.354) | <0.001 |  | 220(44.1) | 472(59.1) | 1.831(1.460,2.295) | <0.001 |  | 141(36.6) | 449(49.2) | 1.675(1.311,2.139) | <0.001 |  | 138(26.3) | 221(43.4) | 2.146(1.652,2.789) | <0.001 |
| **e2** | 70(7.2) | 420(9.6) | 1.364(1.049,1.775) | 0.021 |  | 59(5.2) | 535(11.9) | 2.487(1.885,3.281) | <0.001 |  | 60(5.0) | 468(9.8) | 2.037(1.544,2.685) | <0.001 |  | 120(6.8) | 244(8.8) | 1.312(1.046,1.647) | 0.019 |
| **mx2** | 59(2.6) | 533(12.0) | 5.084(3.866,6.686) | <0.001 |  | 57(2.2) | 522(11.4) | 5.628（4.262,7.431） | <0.001 |  | 64(2.5) | 399(8.2) | 3.508(2.682,4.588) | <0.001 |  | 84(3.6) | 229(8.2) | 2.394(1.853,3.094) | <0.001 |
| **sycamore** | / | 257(7,5) | / | / |  | / | 292(8.9) | / | / |  | 10(3.0) | 228(6.6) | 2.263(1.189,4.307) | 0.013 |  | 18(1.8) | 111(5.1) | 2.918(1.763,4.829) | <0.001 |
| **e1** | / | 207(5.8) | / | / |  | / | 281(7.9) | / | / |  | 7(2.1) | 189(5.0) | 2.433(1.134,5.217) | 0.022 |  | 15(1.5) | 135(6.0) | 4.128(2.408,7.075) | <0.001 |
| **w1** | 12(1.9) | 224(5.3) | 2.942(1.636,5.291) | <0.001 |  | 12(1.6) | 199(4.5) | 3.007(1.671,5.412) | <0.001 |  | 9(0.9) | 162(3.5) | 3.737(1.903,7.339) | <0.001 |  | 32(2.0) | 55(2.1) | 1.007(0.649,1.564) | 0.974 |
| **elm** | / | 95(2.8) | / | / |  | / | 137(4.2) | / | / |  | 3(0.9) | 111(3.2) | 3.622(1.144,11.465) | 0.029 |  | 5(0.5) | 40(1.9) | 3.707(1.459,9.422) | 0.006 |
| **w6** | 14(1.9) | 95(2.3) | 1.177(0.668,2.074) | 0.573 |  | 16(2.0) | 186(4.4) | 2.275(1.357,3.812) | 0.002 |  | 19(1.9) | 130(2.9) | 1.539(0.946,2.503) | 0.082 |  | 22(1.3) | 60(2.3) | 1.705(1.042,2.790) | 0.034 |
| **i6** | 35(3.5) | 77(1.8) | 0.489(0.326,0.733) | 0.001 |  | 38(3.2) | 146(3.3) | 1.002(0.697,1.440) | 0.991 |  | 31(2.6) | 128(2.7) | 1.040(0.699,1.548) | 0.847 |  | 34(1.9) | 41(1.5) | 0.765(0.484,1.210) | 0.252 |
| **w14** | 14(4.3) | 1(0.6) | 0.144(0.019,1.103) | 0.062 |  | 5(1.3) | 3(3.0) | 2.294(0.539,9.768) | 0.261 |  | 1(0.4) | 2(1.9) | 4.590(0.412,51.18) | 0.215 |  | 6(3.2) | 2(2.0) | 0.635(0.126,3.208) | 0.583 |
| **t70** | 10(3.0) | 2(1.3) | 0.410(0.089,1.895) | 0.254 |  | 6(1.6) | 4(4.0) | 2.568(0.710,9.285) | 0.150 |  | 2(0.8) | 2(1.9) | 2.286(0.318,16.445) | 0.412 |  | 2(1.1) | 1(1.0) | 0.964(0.086,10.764) | 0.976 |
| **u80** | 0(0.0) | 47(1.1) | / | 0.992 |  | 7(0.9) | 77(1.8) | 1.952(0.897,4.247) | 0.092 |  | 3(0.3) | 61(1.3) | 4.156(1.301,13.274) | 0.016 |  | 10(0.6) | 22(0.8) | 1.292(0.610,2.734) | 0.504 |
| **f37** | 2(0.6) | 0(0.0) | / | 0.996 |  | 0(0.0) | 2(2.0) | / | 0.993 |  | 0(0.0) | 0(0.0) | / | / |  | 0(0.0) | 0(0.0) | / | / |

**Note:** / indicates that there is no data for this item. Abbreviations: Dermatophagoides pteronyssinus (d1), Dermatophagoides farinae (d2), dog hair (e2), cat hair (e1), cockroaches (i6), mulberry (t70), sycamore pollen (sycamore), elm pollen (elm), grass pollen (u80), mugwort pollen (w6), common ragweed pollen (w1), amaranth (w14), green oysters (f37), mold (mx2)





Figure S1. The number of examined detection cases and positive cases in each month during and before COVID-19. Abbreviations: Dermatophagoides pteronyssinus (d1), Dermatophagoides farinae (d2), dog hair (e2), cockroaches (i6), grass pollen (u80), mugwort pollen (w6), common ragweed pollen (w1), mold (mx2).


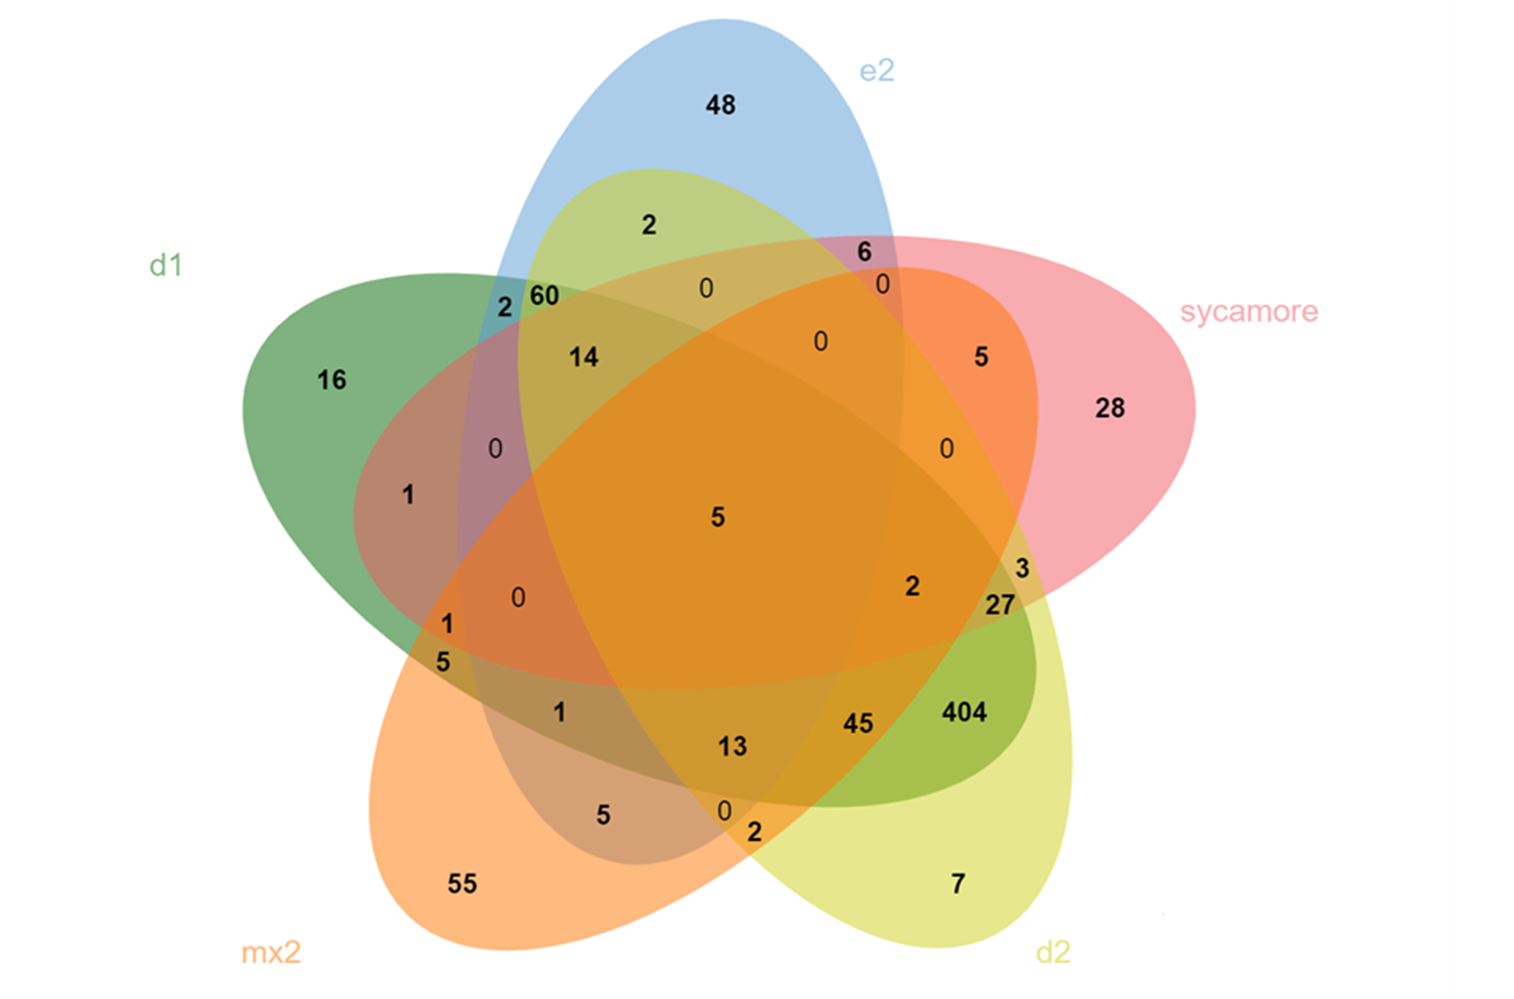


Figure S2. Co-sensitization of common inhaled allergens. Abbreviations: Dermatophagoides pteronyssinus (d1), Dermatophagoides farinae (d2), dog hair (e2), mold (mx2), sycamore pollen (sycamore)
